# Supplementary material
Source: Springer Nature journal article supplement (https://www.springermedizin.de/resource/supplementary/12872_2005_93_MOESM2_ESM.pdf/9431042)

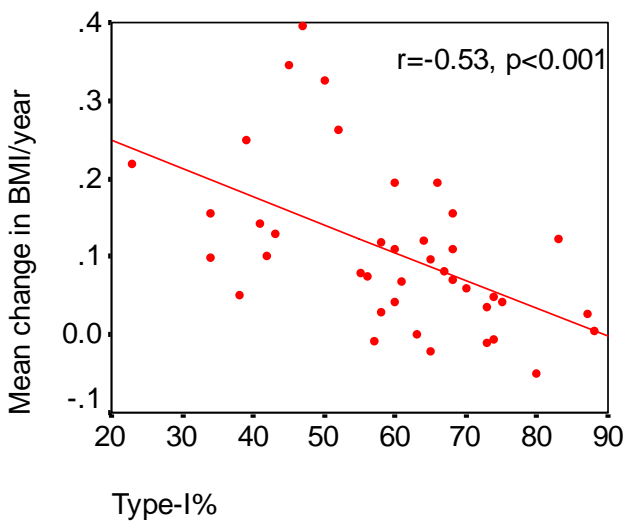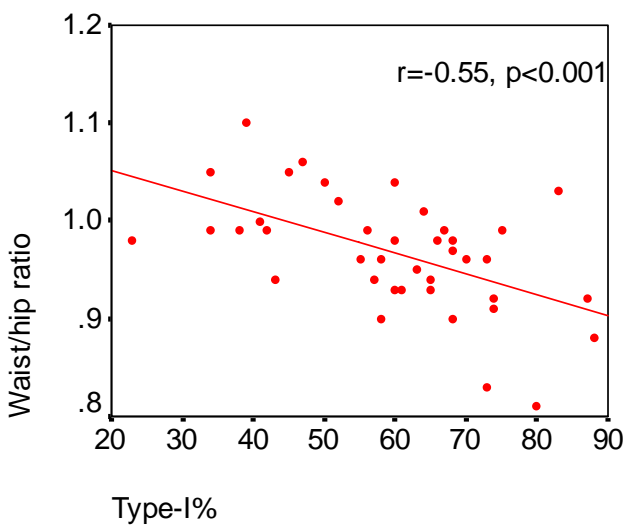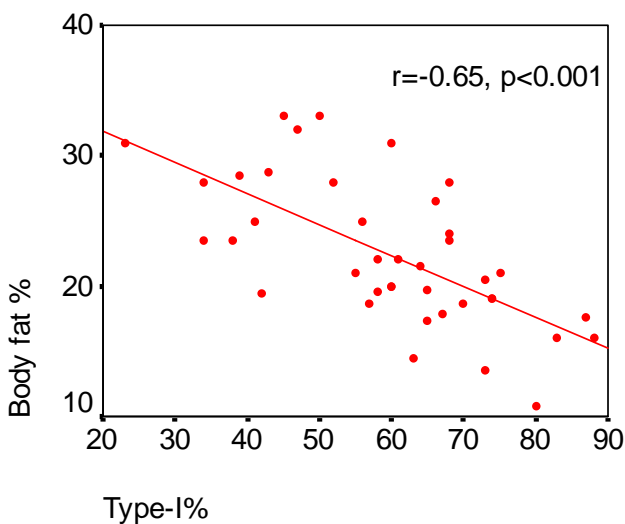

Supplement: MOESM2 [file 9431042]
